# Supplementary material for: Technical note: Determining Arctic Ocean halocline and cold halostad depths based on vertical stability
Source: Copernicus journal article supplement (doi:10.5194/os-19-1453-2023), 2023-10-18
Supplement: Supplementary file 2 [file os-19-1453-2023-supplement.zip]

## Supplement 5

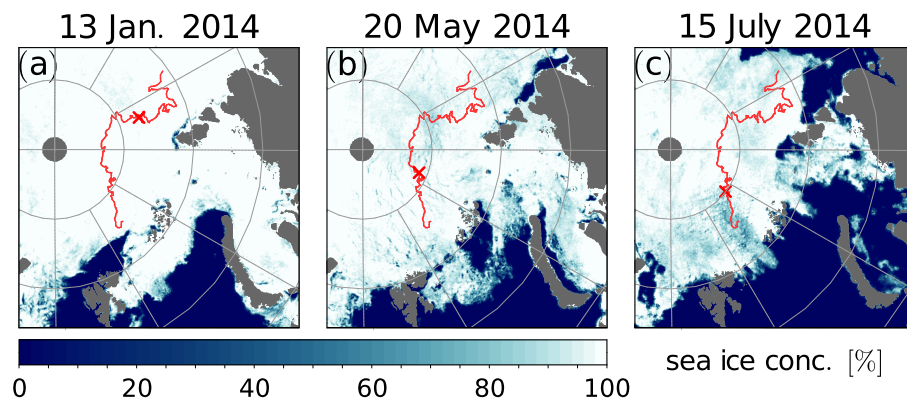

**Figure S5.** ITP-74 location of measurements (indicated by small red crosses along the tracks) and sea ice concentration (area fraction) from Spreen et al. (2008) for the profiles shown in Figure 3. Sea ice data was obtained from <https://www.meereisportal.de> (Grosfeld et al., 2016).
