# Supplementary material for: Technical note: Determining Arctic Ocean halocline and cold halostad depths based on vertical stability
Source: Copernicus journal article supplement (doi:10.5194/os-19-1453-2023), 2023-10-18
Supplement: Supplementary file 3 [file os-19-1453-2023-supplement.zip]

## Supplement 4

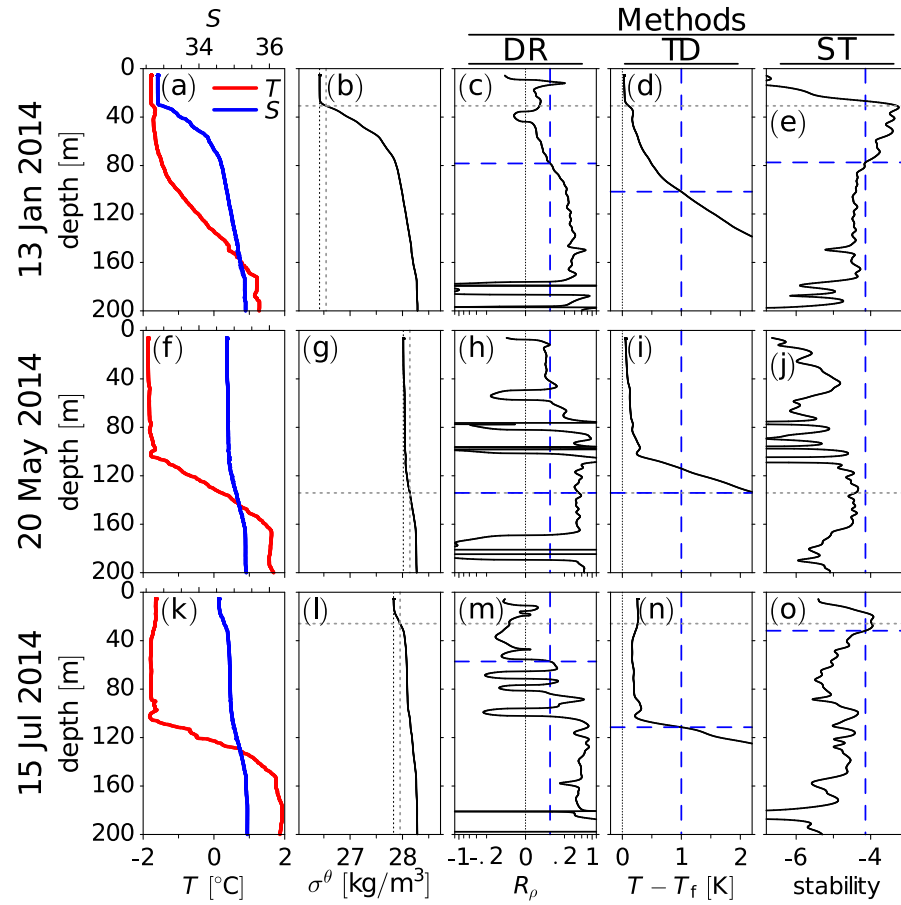

**Figure S4.** As Fig. 3 but based on Level I data and using the International Thermodynamic Equation of Seawater – 2010 (TEOS2010, McDougall et al., 2010) to compute potential density, potential temperature, and potential freezing temperature instead of Gill (1982).
