# Supplementary material for: Technical note: Determining Arctic Ocean halocline and cold halostad depths based on vertical stability
Source: Copernicus journal article supplement (doi:10.5194/os-19-1453-2023), 2023-10-18
Supplement: Supplementary file 6 [file os-19-1453-2023-supplement.zip]

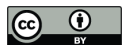

## *Supplement of*

# **Technical note: Determining Arctic Ocean halocline and cold halostad depths based on vertical stability**

**Enrico P. Metzner and Marc Salzmann**

*Correspondence to:* Enrico P. Metzner ([enrico.metzner@uni-leipzig.de](mailto:enrico.metzner@uni-leipzig.de))

- [os-19-1453-2023-supplement-title-page.pdf](#)
- Supplement
  - [supplement1.pdf](#)
  - [supplement2.pdf](#)
  - [supplement3.pdf](#)
  - [supplement4.pdf](#)
  - [supplement5.pdf](#)
  - [supplement6.pdf](#)

The copyright of individual parts of the supplement might differ from the article licence.
