# Supplementary material for: Technical note: Determining Arctic Ocean halocline and cold halostad depths based on vertical stability
Source: Copernicus journal article supplement (doi:10.5194/os-19-1453-2023), 2023-10-18
Supplement: Supplementary file 7 [file os-19-1453-2023-supplement.zip]

## Supplement 2

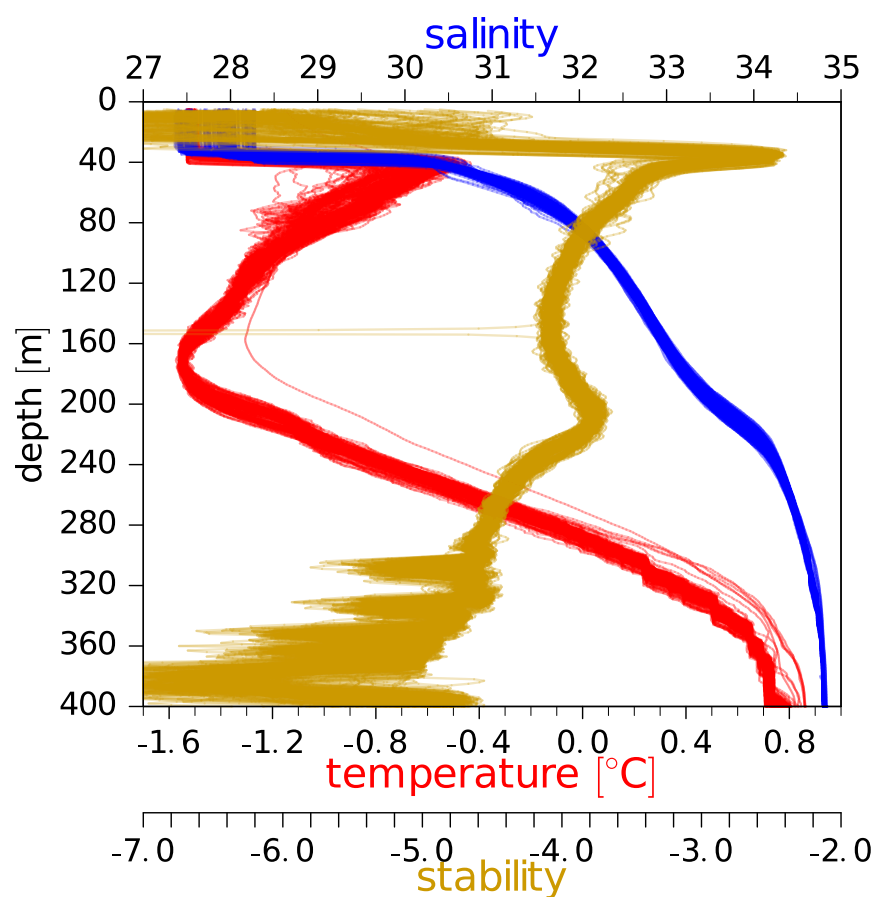

**Figure S2.** Profiles of salinity (blue), temperature (red), and stability (brown) from ITP-41 Level III data for days from 16 Feb 2011 to 27 May 2011 (Krishfield et al., 2008; Toole et al., 2011). Compare also schematic in Supplement 1. Salinity is in the practical salinity scale. Stability ( $L$ , unitless) was computed as described in Sect. 2.1.3. Below 280 m, thermohaline staircases are found in the Atlantic Water.
